# Supplementary material for: New Soil, Old Plants, and Ubiquitous Microbes: Evaluating the Potential of Incipient Basaltic Soil to Support Native Plant Growth and Influence Belowground Soil Microbial Community Composition
Source: Preprints.org preprint supplement (doi:10.20944/preprints201809.0300.v1), 2018-09-17
Supplement: Supplementary file 1 [file Supplementary Table 1.xlsx]

## Sheet: Sheet1
Sample	pH	se	TC (ug mg-1)	se	TN (ug mg-1)	se	TOC (ug mg-1)	se	TIC (ug mg-1)	se	Percent moisture content	se	Bulk Density (g cm-3)	se	Average % Germination	se	Average Plant Growth (cm)	se	Wet Aboveground Biomass (g)	se	Dry Aboveground Biomass (g)	se
LPM_Bean	9.45	0.01	0.267	0.001	0.019	0.001	0.18	0.001	0.077	0.001	3.8	0.1	2.01	0.01	13.3333	12.4722	10	9.09212	1.22933	1.21805	0.221333	0.241961
LPM_Grass	9.43	0.01	0.245	0.001	0.006	0.001	0.144	0.001	0.084	0.001	4.1	0.1	1.68	0.02	70	16.3299	16	5.71548	0.201	0.105322	0.0426667	0.024608
LPM_Mesquite	9.44	0.01	0.235	0.001	0.009	0.001	0.139	0.001	0.096	0.001	3.5	0.1	1.82	0.01	40	8.16497	14.3333	1	0.267333	0.0393305	0.115333	0.0127628
LPMC_Bean	8.49	0.01	26.3	0.002	2.28	0.002	18.7	0.002	7.45	0.002	5.3	0.1	1.74	0.01	10	0	17	2.16025	1.274	0.611996	0.268333	0.0996839
LPMC_Grass	8.47	0.01	16	0.002	1.57	0.002	13.2	0.002	2.95	0.002	5.2	0.1	1.66	0.01	76.6667	16.9967	27.3333	1.69967	0.428667	0.108702	0.112	0.0430426
LMPC_Mesquite	8.49	0.02	42.4	0.02	3.67	0.02	33.8	0.02	8.6	0.02	5.4	0.1	1.62	0.02	40	8.16497	15.6667	2	0.270333	0.0398859	0.133	0.0123558
PS_Bean	6.77	0.03	311	0	10.7	0	188	0	123	0	51	0.1	0.59	0.01	50	8.16497	39	2.16025	12.0487	3.36089	2.43967	0.586961
PS_Grass	6.37	0.01	332	0.1	9.5	0.1	206	0.1	126	0.1	51	0.1	0.8	0.01	93.3333	9.42809	53.6667	3.09121	4.36633	0.508285	0.799667	0.237263
PS_Mesquite	6.22	0.02	320	0.1	10.2	0.1	245	0.1	75.3	0.1	48	0.1	0.94	0.01	53.3333	0	24.6667	2.49444	0.913667	0.305257	0.323333	0.113696
PS	5.18	0.01	293	0.2	13.3	0.2	213	0.2	80.2	0.2	50	0.1	0.8	0.02	NA	NA	NA	NA	NA	NA	NA	NA
LPMC	9.43	0.01	19.4	0.1	1.56	0.1	15.9	0.1	3.45	0.1	3	0.1	1.82	0.02	NA	NA	NA	NA	NA	NA	NA	NA
IW	7.51	0.01	5.82	0.1	7.14	0.1	1.12	0.1	4.68	0.1	NA	NA	NA	NA	NA	NA	NA	NA	NA	NA	NA	NA
PM	9.82	0.01	9.33 × 10−5	0.001	4.33 × 10−6	0.001	7.03 × 10−5	0.001	2.30 × 10−5	0.001	5	0.1	1.74	0.02	NA	NA	NA	NA	NA	NA	NA	NA
